# Supplementary material
Source: PubMed Central journal article supplement (PMC6973062)
Supplement: ENE-27-334-s003.pdf [file ENE-27-334-s003.pdf]

| avsnp150    | SIFT_score | SIFT_convert<br>d_rankscore | SIFT_pred | Polyphen2<br>_HDIV_sco<br>re | Polyphen2<br>_HDIV_ran<br>kscore | Polyphen2_HD<br>IV_pred | MutationT<br>aster_scor<br>e | MutationT<br>aster_con<br>verted_ra<br>nkscore | MutationT<br>aster_pre<br>d | PROVEAN_<br>score | PROVEAN_con<br>verted_ranksc<br>ore | PROVEAN<br>_pred | VEST3_<br>score | VEST3_<br>ranksc<br>ore |
|-------------|------------|-----------------------------|-----------|------------------------------|----------------------------------|-------------------------|------------------------------|------------------------------------------------|-----------------------------|-------------------|-------------------------------------|------------------|-----------------|-------------------------|
| rs369901030 | 0.011      | 0.555                       | D         | 0.998                        | 0.715                            | D                       | 1                            | 0.81                                           | D                           | -2.48             | 0.54                                | N                | 0.719           | 0.72                    |
| NA          | .          | .                           | .         | .                            | .                                | .                       | 1                            | 0.81                                           | D                           | .                 | .                                   | .                | .               | .                       |
| NA          | .          | .                           | .         | .                            | .                                | .                       | 1                            | 0.81                                           | A                           | .                 | .                                   | .                | .               | .                       |
| NA          | 0.003      | 0.682                       | D         | 1                            | 0.899                            | D                       | 1                            | 0.81                                           | D                           | -4.54             | 0.784                               | D                | 0.526           | 0.567                   |
| NA          | NA         | NA                          | NA        | NA                           | NA                               | NA                      | NA                           | NA                                             | NA                          | NA                | NA                                  | NA               | NA              | NA                      |
| NA          | 0.798      | 0.031                       | T         | 0.002                        | 0.09                             | B                       | 0.998                        | 0.441                                          | D                           | 0.15              | 0.053                               | N                | 0.071           | 0.062                   |
| NA          | 0.002      | 0.721                       | D         | 1                            | 0.899                            | D                       | 1                            | 0.81                                           | D                           | -2.46             | 0.537                               | N                | 0.759           | 0.753                   |

| MetaSVM_score | MetaSVM_rankscore | MetaSVM_pred | MetaLR_score | MetaLR_rankscore | MetaLR_pred | M-CAP_score | M-CAP_rankscore | M-CAP_pred | CADD_raw | CADD_rankscore | CADD_phred | DANN_score | DANN_rankscore | GenoCanyon_score | GenoCanyon_rankscore |
|---------------|-------------------|--------------|--------------|------------------|-------------|-------------|-----------------|------------|----------|----------------|------------|------------|----------------|------------------|----------------------|
| 1.069         | 0.986             | D            | 0.955        | 0.985            | D           | 0.648       | 0.97            | D          | 5.24     | 0.708          | 25.6       | 0.997      | 0.82           | 1                | 0.747                |
| .             | .                 | .            | .            | .                | .           | .           | .               | .          | 12.02    | 0.98           | 38         | 0.997      | 0.83           | 1                | 0.747                |
| .             | .                 | .            | .            | .                | .           | .           | .               | .          | 9.259    | 0.962          | 35         | 0.994      | 0.613          | 1                | 0.48                 |
| 1.015         | 0.975             | D            | 0.986        | 0.996            | D           | 0.705       | 0.976           | D          | 5.112    | 0.689          | 25.3       | 0.996      | 0.747          | 1                | 0.747                |
| NA            | NA                | NA           | NA           | NA               | NA          | NA          | NA              | NA         | NA       | NA             | NA         | NA         | NA             | NA               | NA                   |
| -0.598        | 0.649             | T            | 0.454        | 0.787            | T           | 0.549       | 0.958           | D          | 0.943    | 0.184          | 10.33      | 0.973      | 0.328          | 0.746            | 0.233                |
| 1.063         | 0.984             | D            | 0.988        | 0.997            | D           | 0.833       | 0.987           | D          | 4.482    | 0.6            | 24.2       | 0.996      | 0.738          | 0.912            | 0.263                |

| integrated_fit<br>Cons_score | integrated_fit<br>Cons_score_r<br>ankscore | integrated_co<br>nfidence_valu<br>e | GERP++_<br>RS | GERP++_RS<br>_rankscore | phyloP100way<br>_vertebrate | phyloP100way<br>_vertebrate_r<br>ankscore | phyloP20way_<br>mammalian | phyloP20way_<br>mammalian_r<br>ankscore | phastCons100<br>way_vertebrat<br>e | phastCons100<br>way_vertebrat<br>e_rankscore | phastCons20w<br>ay_mammalia<br>n |
|------------------------------|--------------------------------------------|-------------------------------------|---------------|-------------------------|-----------------------------|-------------------------------------------|---------------------------|-----------------------------------------|------------------------------------|----------------------------------------------|----------------------------------|
| 0.598                        | 0.34                                       | 0                                   | 3.77          | 0.423                   | 6.971                       | 0.757                                     | 0.893                     | 0.41                                    | 1                                  | 0.715                                        | 0.984                            |
| 0.765                        | 0.991                                      | 0                                   | 3.77          | 0.423                   | 8.733                       | 0.912                                     | 0.893                     | 0.41                                    | 1                                  | 0.715                                        | 0.997                            |
| 0.598                        | 0.34                                       | 0                                   | 3.12          | 0.348                   | 1.532                       | 0.354                                     | 0.788                     | 0.318                                   | 1                                  | 0.715                                        | 0.996                            |
| 0.765                        | 0.991                                      | 0                                   | 2.89          | 0.326                   | 5.485                       | 0.664                                     | 0.911                     | 0.421                                   | 1                                  | 0.715                                        | 0.999                            |
| NA                           | NA                                         | NA                                  | NA            | NA                      | NA                          | NA                                        | NA                        | NA                                      | NA                                 | NA                                           | NA                               |
| 0.598                        | 0.34                                       | 0                                   | 2.42          | 0.286                   | 0.893                       | 0.278                                     | 0.878                     | 0.384                                   | 0.949                              | 0.328                                        | 0.993                            |
| 0.598                        | 0.34                                       | 0                                   | 1.83          | 0.242                   | 1.473                       | 0.348                                     | 0.037                     | 0.153                                   | 0.951                              | 0.329                                        | 0.997                            |

| phastCons20way_mammalia_rankscore | SiPhy_29way_logOdds | SiPhy_29way_logOdds_rankscore | Interpro_domain | regsnp_fpr | regsnp_disease | regsnp_splicing_site | dpsi_max_tissue | dpsi_zscore | REVEL | MCAP        |
|-----------------------------------|---------------------|-------------------------------|-----------------|------------|----------------|----------------------|-----------------|-------------|-------|-------------|
| 0.507                             | 15.006              | 0.71                          |                 | NA         | NA             | NA                   | 0.1055          | 0.5         | 0.824 | 0.648072378 |
| 0.653                             | 15.006              | 0.71                          | Homeobox domain | NA         | NA             | NA                   | -5.0039         | -2.5        | NA    | NA          |
| 0.625                             | 11.332              | 0.485                         | NA              | NA         | NA             | NA                   | NA              | NA          | NA    | NA          |
| 0.75                              | 11.932              | 0.519                         | Homeobox domain | NA         | NA             | NA                   | NA              | NA          | 0.937 | 0.704530124 |
| NA                                | NA                  | NA                            | NA              | NA         | NA             | NA                   | NA              | NA          | NA    | NA          |
| 0.574                             | 5.085               | 0.139                         | NA              | NA         | NA             | NA                   | NA              | NA          | 0.207 | 0.548574815 |
| 0.653                             | 6.722               | 0.224                         | Homeobox domain | NA         | NA             | NA                   | 0.0605          | 0.344       | 0.827 | 0.832563598 |

| CLNSIG     | CLNDBN                                                                              | CLNACC         | CLNDSDB     | CLNDSDBID       |
|------------|-------------------------------------------------------------------------------------|----------------|-------------|-----------------|
| NA         | NA                                                                                  | NA             | NA          | NA              |
| NA         | NA                                                                                  | NA             | NA          | NA              |
| Pathogenic | SPASTIC ATAXIA 8,<br>AUTOSOMAL RECESSIVE,<br>WITH HYPOMYELINATING<br>LEUKODYSTROPHY | RCV000494722.1 | MedGen:OMIM | CN303160:617560 |
| NA         | NA                                                                                  | NA             | NA          | NA              |
| NA         | NA                                                                                  | NA             | NA          | NA              |
| NA         | NA                                                                                  | NA             | NA          | NA              |
| Pathogenic | SPASTIC ATAXIA 8,<br>AUTOSOMAL RECESSIVE,<br>WITH HYPOMYELINATING<br>LEUKODYSTROPHY | RCV000494724.1 | MedGen:OMIM | CN303160:617560 |
