# Supplementary material
Source: PubMed Central journal article supplement (PMC6973062)

Supplemental S4

A

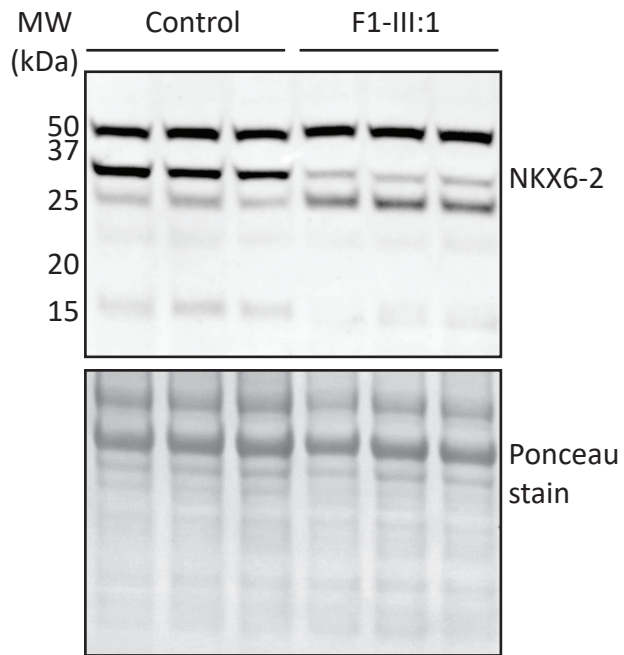

B

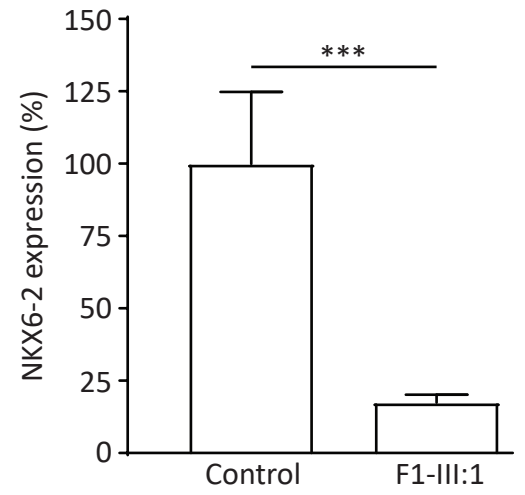

Supplement: ENE-27-334-s004.pdf [file ENE-27-334-s004.pdf]
